# Supplementary material for: First family with Perry syndrome from Mexico
Source: PubMed Central journal article supplement — Biomed Rep. 2024 Jun 19;21(2):120. doi: 10.3892/br.2024.1808 (PMC11229396; doi:10.3892/br.2024.1808), 2024-06-19
Supplement: Supplementary_Data2.pdf [file Supplementary_Data2.pdf]

**Table S1.** Genetic variants affecting the ‘dynactin subunit 1’ gene reported in Perry syndrome.

| <b>Phenotype</b> | <b>Transcript</b> | <b>HGVS nucleotide</b> | <b>HGVS protein</b> | <b>Country of the patient (ref.)</b>                                                                  |
|------------------|-------------------|------------------------|---------------------|-------------------------------------------------------------------------------------------------------|
| Perry syndrome   | NM_004082         | c.121C>T               | Arg41Ter            | Japan (1)                                                                                             |
|                  |                   | c.133G>C               | Ala45Pro            | India (2)                                                                                             |
|                  |                   | c.156T>G               | Phe52Leu            | Japan(3), Japan (4), Portuguese (5)                                                                   |
|                  |                   | c.200G>A               | Gly67Asp            | UK (6), Republic of Korea (7), Argentina (8)                                                          |
|                  |                   | c.202A>G               | Lys68Glu            | Japan (9)                                                                                             |
|                  |                   | c.202A>G               | Gly71Val            | Japan (9)                                                                                             |
|                  |                   | c.212G>C               | Gly71Ala            | USA (10), England (10), Japan (10), USA (11)                                                          |
|                  |                   | c.212G>A               | Gly71Glu            | Mexico (present study), France (10), Poland (12), France (13), Canada(14), Poland (14)                |
|                  |                   | c.211G>A               | Gly71Arg            | Canada (10), Turkey (10), USA (15), Colombian (15), UK (16), Republic of Korea (7), USA (11), UK (17) |
|                  |                   | c.212G>T               | Gly71Val            | Japan (9)                                                                                             |
|                  |                   | c.214A>C               | Thr72Pro            | USA (10)                                                                                              |
|                  |                   | c.221A>C               | Gln74Pro            | Japan (10)                                                                                            |
|                  |                   | c.233A>G               | Tyr78Cys            | New Zealand (15), New Zealand (18), Republic of Korea (7)                                             |
|                  |                   | c.232T>C               | Tyr78His            | USA (19)                                                                                              |

HGVS, Human Genome Variation Society.

**Table III.** Clinical characteristics of patients with Perry syndrome with Gly71Glu (G71E) reported in various countries.

| <b>Characteristic</b>          | <b>Mexico<br/>(present study)</b> | <b>Poland -<br/>Konno <i>et al</i><br/>(17), 2017</b> | <b>France -<br/>Caroppo <i>et al</i><br/>(16), 2013</b> | <b>France -<br/>Lechevalier <i>et al</i><br/>(20), 1992</b> | <b>Canada - Purdy <i>et al</i><br/>(21), 1979</b> |
|--------------------------------|-----------------------------------|-------------------------------------------------------|---------------------------------------------------------|-------------------------------------------------------------|---------------------------------------------------|
| Number of affected members     | 4                                 | 4                                                     | 8                                                       | 5                                                           | 3                                                 |
| Age of proband at onset, years | 49                                | 42                                                    | 39-59                                                   | NA                                                          | 46                                                |
| Age of proband at death, years | 57                                | NA                                                    | 43-64                                                   | NA                                                          | 48                                                |
| Cause of death                 | Respiratory failure               | NA                                                    | Respiratory failure                                     | Respiratory failure                                         | Respiratory failure                               |
| Parkinsonism                   | +                                 | +                                                     | +                                                       | +                                                           | +                                                 |
| Weight loss                    | +                                 | +                                                     | +                                                       | +                                                           | +                                                 |
| Depression/<br>apathy          | - <sup>a</sup>                    | +                                                     | +                                                       | +                                                           | +                                                 |
| Hypoventilation                | +                                 | +                                                     | +                                                       | +                                                           | +                                                 |
| Additional clinical features   | NA                                | NA                                                    | Slow vertical saccade,<br>blepharospasm                 | NA                                                          | NA                                                |

<sup>a</sup>Depression was not reported by the patient or his wife, but a formal psychiatric evaluation was not performed in the patient. Farrer *et al* 2008 (10) detected a family in France but did not report the clinical data. NA, information not available; +, positive/present; -, negative.
